# Supplementary material
Source: PubMed Central journal article supplement (PMC6066357)
Supplement: EHP1876.s001.acco.pdf [file EHP1876.s001.acco.pdf]

**Note to readers with disabilities:** *EHP* strives to ensure that all journal content is accessible to all readers. However, some figures and Supplemental Material published in *EHP* articles may not conform to [508 standards](#) due to the complexity of the information being presented. If you need assistance accessing journal content, please contact [ehp508@niehs.nih.gov](mailto:ehp508@niehs.nih.gov). Our staff will work with you to assess and meet your accessibility needs within 3 working days.

### **Supplemental Material**

#### **The Association between Lifelong Greenspace Exposure and 3-Dimensional Brain Magnetic Resonance Imaging in Barcelona Schoolchildren**

Payam Dadvand, Jesus Pujol, Dídac Macià, Gerard Martínez-Vilavella, Laura Blanco-Hinojo, Marion Mortamais, Mar Alvarez-Pedrerol, Raquel Fenoll, Mikel Esnaola, Albert Dalmau-Bueno, Mónica López-Vicente, Xavier Basagaña, Michael Jerrett, Mark J. Nieuwenhuijsen, and Jordi Sunyer

#### **Table of Contents**

**Table S1.** Regression coefficients of the univariate linear regression models with lifelong residential surrounding greenness as outcome and age, sex, and maternal education (one at a time) as predictor.

**Table S2.** Regional clusters associated with lifelong exposure to greenness controlled for individual (maternal education) and neighborhood (urban vulnerability index) socioeconomic status. All clusters reported correspond to cluster size p-values <0.05.

**Table S3.** Regional clusters associated with HRT-SE (A), 2-back  $d'$  (B), and 3-back  $d'$  (C). All clusters reported correspond to cluster size p-values <0.05.

**Supplemental Materials, Table S1.** Regression coefficients of the univariate linear regression models with lifelong residential surrounding greenness<sup>a</sup> as outcome and age, sex, and maternal education (one at a time) as predictor.

| <b>Predictor</b>                       | <b>Regression coefficient<br/>(95% Confidence intervals)</b> | <b>p-value</b> |
|----------------------------------------|--------------------------------------------------------------|----------------|
| <b>Age (Years)</b>                     | 0.005 (-0.005, 0.015)                                        | 0.30           |
| <b>Sex</b>                             |                                                              |                |
| Boy                                    | 1                                                            |                |
| Girl                                   | -0.015 (-0.032, 0.002)                                       | 0.08           |
| <b>Maternal educational attainment</b> |                                                              |                |
| None or primary school                 | 1                                                            |                |
| Secondary school                       | -0.001 (-0.034, 0.031)                                       | 0.93           |
| University                             | 0.014 (-0.015, 0.043)                                        | 0.35           |

<sup>a</sup> Average of normalized difference vegetation index (NDVI) across a buffer of 100 m around the residential address(es) since birth, weighted by the time the participant spent in each address.

**Supplemental Materials, Table S2.** Regional clusters associated with lifelong exposure to greenness<sup>a</sup> controlled for individual (maternal education) and neighborhood (urban vulnerability index) socioeconomic status. All clusters reported correspond to cluster size p-values <0.05.

| Location                     | Adjusted for maternal education         |                      |                    |                |                      | Adjusted for urban vulnerability index  |                      |                    |                |                      |
|------------------------------|-----------------------------------------|----------------------|--------------------|----------------|----------------------|-----------------------------------------|----------------------|--------------------|----------------|----------------------|
|                              | Cluster size <sup>b</sup> , voxels (ml) | p-value <sup>c</sup> | x y z <sup>d</sup> | t <sup>e</sup> | p-value <sup>f</sup> | Cluster size <sup>b</sup> , voxels (ml) | p-value <sup>c</sup> | x y z <sup>d</sup> | t <sup>e</sup> | p-value <sup>f</sup> |
| <b>Grey Matter</b>           |                                         |                      |                    |                |                      |                                         |                      |                    |                |                      |
| Left premotor cortex         | 964 (3.3)                               | 0.008                | -33 -5 60          | 3.02           | 0.001                | 1151 (3.9)                              | 0.001                | -33 -5 60          | 3.05           | 0.001                |
| Left prefrontal cortex       | 587 (2.0)                               | 0.09                 | -33 23 26          | 2.80           | 0.002                | 358 (1.2)                               | 0.40                 | -35 24 26          | 2.7            | 0.004                |
| Right prefrontal cortex      |                                         |                      |                    |                |                      |                                         |                      |                    |                |                      |
| Superior cluster             | 1268 (4.3) <sup>g</sup>                 | <0.0005              | 26 26 17           | 3.02           | 0.001                | 2631 (8.9) <sup>g</sup>                 | <0.0005              | 27 23 18           | 3.05           | 0.001                |
| Inferior cluster (Operculum) | 1268 (4.3) <sup>g</sup>                 | <0.0005              | 42 29 3            | 3.21           | 0.0008               | 2631 (8.9) <sup>g</sup>                 | <0.0005              | 42 29 3            | 3.3            | 0.0006               |
| <b>White Matter</b>          |                                         |                      |                    |                |                      |                                         |                      |                    |                |                      |
| Cerebellum                   |                                         |                      |                    |                |                      |                                         |                      |                    |                |                      |
| Left hemisphere              | 8462 (28.6) <sup>g</sup>                | <0.0005              | -26 -60 -39        | 3.19           | 0.0008               | 13765 (46.5) <sup>g</sup>               | <0.0005              | -24 -59 -37        | 3.34           | 0.0004               |
| Right hemisphere             | 8462 (28.6) <sup>g</sup>                | <0.0005              | 23 -77 -17         | 3.06           | 0.001                | 13765 (46.5) <sup>g</sup>               | <0.0005              | 24 -74 -30         | 3.26           | 0.0006               |
| Left Premotor region         | 519 (1.8)                               | 0.14                 | -29 -5 56          | 3.00           | 0.001                | 709 (2.4)                               | 0.036                | -29 -5 54          | 2.97           | 0.0016               |
| Right prefrontal region      |                                         |                      |                    |                |                      |                                         |                      |                    |                |                      |
| Superior cluster             | 354 (1.2)                               | 0.40                 | 41 31 14           | 3.01           | 0.001                | 461(1.6)                                | 0.20                 | 41 32 14           | 3.04           | 0.001                |
| Inferior cluster (operculum) | 922 (3.1)                               | 0.01                 | 53 18 0            | 4.04           | <0.0005              | 890 (3.0)                               | 0.01                 | 53 18 0            | 3.80           | 0.00009              |

<sup>a</sup> Average of normalized difference vegetation index (NDVI) across a buffer of 100 m around the residential address(es) since birth, weighted by the time the participant spent

in each address.

<sup>b</sup> The number of voxels each showing statistically significant association with lifelong residential surrounding greenness.

<sup>c</sup> Cluster size p-value which establishes the probability of the occurrence of a cluster of the specified voxel size or larger under the null hypothesis of a brain made of voxels

with only spatially autocorrelated noise.

<sup>d</sup> x y z, coordinates of the voxel with maximum (peak) t-value inside the corresponding cluster provided in Montreal Neurological Institute (MNI) space.

<sup>e</sup> Maximum (peak) t-value within the cluster. The t-values are generated from the voxel-wise regression model.

<sup>f</sup> Peak p-value which establishes the probability of occurrence of the specified t-value or greater generated by the voxel-wise regression model. The p-value of each row

corresponds to the maximum (peak) t-value of each cluster.

<sup>g</sup> Two parts of a single cluster.

**Supplemental Materials, Table S3.** Regional clusters associated with HRT-SE<sup>a</sup> (A), 2-back  $d'$  (B), and 3-back  $d'$  (C). All clusters reported correspond to cluster size  $p$ -values <0.05.

(A)

| Location                   | Cluster size <sup>b</sup> ,<br>voxels (ml) | $p$ -value <sup>c</sup> | $x$ $y$ $z$ <sup>d</sup> | $t$ <sup>e</sup> | $p$ -value <sup>f</sup> |
|----------------------------|--------------------------------------------|-------------------------|--------------------------|------------------|-------------------------|
| <b>Grey Matter</b>         |                                            |                         |                          |                  |                         |
| Prefrontal cortex          |                                            |                         |                          |                  |                         |
| Left hemisphere            | 214213 (723.0) <sup>g</sup>                | <0.0005                 | -43 36 39                | 3.72             | <0.0005                 |
| Right hemisphere           | 214213 (723.0) <sup>g</sup>                | <0.0005                 | 26 57 22                 | 4.15             | <0.0005                 |
| Left premotor cortex       | 214213 (723.0) <sup>g</sup>                | <0.0005                 | -37 -3 54                | 2.62             | 0.009                   |
| Inferior parietal cortex   |                                            |                         |                          |                  |                         |
| Left hemisphere            | 214213 (723.0) <sup>g</sup>                | <0.0005                 | -44 -60 43               | 4.44             | <0.0005                 |
| Right hemisphere           | 214213 (723.0) <sup>g</sup>                | <0.0005                 | 45 -66 49                | 3.84             | <0.0005                 |
| Cerebellum                 |                                            |                         |                          |                  |                         |
| Left hemisphere            | 214213 (723.0) <sup>g</sup>                | <0.0005                 | -21 -49 -33              | 4.67             | <0.0005                 |
| Right hemisphere           | 214213 (723.0) <sup>g</sup>                | <0.0005                 | 16.5 -67 -33             | 3.89             | <0.0005                 |
| Temporal-occipital cortex  |                                            |                         |                          |                  |                         |
| Left hemisphere            | 214213 (723.0) <sup>g</sup>                | <0.0005                 | -30 -49 -6               | 4.47             | <0.0005                 |
| Right hemisphere           | 214213 (723.0) <sup>g</sup>                | <0.0005                 | 48 -45 3                 | 3.54             | 0.0005                  |
| Hippocampal-complex        | 214213 (723.0) <sup>g</sup>                | <0.0005                 | -21 -25 -18              | 4.56             | <0.0005                 |
| Cingulate gyrus            | 214213 (723.0) <sup>g</sup>                | <0.0005                 | 11 -36 30                | 3.61             | <0.0005                 |
| <b>White Matter</b>        |                                            |                         |                          |                  |                         |
| Cerebellum                 |                                            |                         |                          |                  |                         |
| Left hemisphere            | 44774 (151.1) <sup>h</sup>                 | <0.0005                 | -20 -34 -48              | 3.47             | 0.0006                  |
| Right hemisphere           | 44774 (151.1) <sup>h</sup>                 | <0.0005                 | 28 -52 -18               | 3.72             | <0.0005                 |
| Brainstem/Thalamus         | 44774 (151.1) <sup>h</sup>                 | <0.0005                 | -10 -40 -44              | 4.17             | <0.0005                 |
| Hippocampal-complex        | 44774 (151.1) <sup>h</sup>                 | <0.0005                 | -16 -25 -17              | 4.02             | <0.0005                 |
| Inferior parietal region   |                                            |                         |                          |                  |                         |
| Right hemisphere           | 10113 (34.1)                               | <0.0005                 | 39 -66 31                | 4.08             | <0.0005                 |
| Left hemisphere            | 24946 (84.2) <sup>h</sup>                  | <0.0005                 | -33 -43 58               | 3.44             | 0.0007                  |
| Sensorimotor region        |                                            |                         |                          |                  |                         |
| Right hemisphere           | 24946 (84.2) <sup>h</sup>                  | <0.0005                 | 26 -28 58                | 4.63             | <0.0005                 |
| Left hemisphere            | 24946 (84.2) <sup>h</sup>                  | <0.0005                 | -28 -13 63               | 4.46             | <0.0005                 |
| Supplementary motor region | 24946 (84.2) <sup>h</sup>                  | <0.0005                 | 10 0 61                  | 3.56             | <0.0005                 |
| Left Prefrontal region     | 24946 (84.2) <sup>h</sup>                  | <0.0005                 | -3 51 22                 | 3.20             | 0.002                   |

**(B)**

| <b>Location</b>               | <b>Cluster size<sup>b</sup>,<br/>voxels (ml)</b> | <b>p-value<sup>c</sup></b> | <b>x y z<sup>d</sup></b> | <b>t<sup>e</sup></b> | <b>p-value<sup>f</sup></b> |
|-------------------------------|--------------------------------------------------|----------------------------|--------------------------|----------------------|----------------------------|
| <b>Grey Matter</b>            |                                                  |                            |                          |                      |                            |
| Prefrontal cortex             |                                                  |                            |                          |                      |                            |
| Left hemisphere               | 62404 (210.6) <sup>i</sup>                       | <0.0005                    | -26 41 46                | 3.44                 | <0.0005                    |
| Right hemisphere              | 62404 (210.6) <sup>i</sup>                       | <0.0005                    | 27 35 51                 | 3.70                 | <0.0005                    |
| Left premotor cortex          | 62404 (210.6) <sup>i</sup>                       | <0.0005                    | -27 -9 46                | 3.43                 | <0.0005                    |
| Lateral temporal cortex       |                                                  |                            |                          |                      |                            |
| Left hemisphere               | 62404 (210.6) <sup>i</sup>                       | <0.0005                    | -38 3 -41                | 3.61                 | <0.0005                    |
| Right hemisphere              | 62404 (210.6) <sup>i</sup>                       | <0.0005                    | 59 -16 -27               | 3.37                 | <0.0005                    |
| Basal ganglia                 | 62404 (210.6) <sup>i</sup>                       | <0.0005                    | -11 9 -3                 | 3.42                 | <0.0005                    |
| Inferior parietal cortex      |                                                  |                            |                          |                      |                            |
| Left hemisphere               | 8473 (28.6)                                      | <0.0005                    | -54 -54 24               | 4.36                 | <0.0005                    |
| Right hemisphere              | 1412 (4.8)                                       | <0.0005                    | 60 -60 34                | 3.26                 | 0.001                      |
| Cerebellum                    |                                                  |                            |                          |                      |                            |
| Left hemisphere               | 9265 (31.3) <sup>j</sup>                         | <0.0005                    | -21 -58 -36              | 3.76                 | <0.0005                    |
| Right hemisphere              | 9265 (31.3) <sup>j</sup>                         | <0.0005                    | 23 -91 -30               | 2.92                 | 0.002                      |
| <b>White Matter</b>           |                                                  |                            |                          |                      |                            |
| Cerebellum                    |                                                  |                            |                          |                      |                            |
| Left hemisphere               | 45236 (152.7) <sup>k</sup>                       | <0.0005                    | -12 -36 -11              | 2.85                 | 0.005                      |
| Right hemisphere              | 45236 (152.7) <sup>k</sup>                       | <0.0005                    | 32 -61 -30               | 3.03                 | 0.003                      |
| Brainstem/Thalamus            | 45236 (152.7) <sup>k</sup>                       | <0.0005                    | 6 -45 -44                | 5.52                 | <0.0005                    |
| Hippocampal-complex           | 45236 (152.7) <sup>k</sup>                       | <0.0005                    | -20 -16 -12              | 3.16                 | 0.002                      |
| Left Premotor region          | 45236 (152.7) <sup>k</sup>                       | <0.0005                    | -34 -3 45                | 2.81                 | 0.005                      |
| Prefrontal region             |                                                  |                            |                          |                      |                            |
| Right hemisphere              | 45236 (152.7) <sup>k</sup>                       | <0.0005                    | 21 33 34                 | 3.29                 | 0.001                      |
| Left hemisphere               | 2802 (9.5)                                       | <0.0005                    | -21 42 33                | 4.46                 | <0.0005                    |
| Sensorimotor region           | 886 (3.0)                                        | 0.012                      | -36 -34 45               | 3.43                 | 0.0007                     |
| Left inferior parietal region | 983 (3.3)                                        | 0.006                      | -8 -58 31                | 3.14                 | 0.002                      |

(C)

| Location                      | Cluster size <sup>b</sup> ,<br>voxels (ml) | p-value <sup>c</sup> | x y z <sup>d</sup> | t <sup>e</sup> | p-value <sup>f</sup> |
|-------------------------------|--------------------------------------------|----------------------|--------------------|----------------|----------------------|
| <b>Grey Matter</b>            |                                            |                      |                    |                |                      |
| Prefrontal cortex             |                                            |                      |                    |                |                      |
| Left hemisphere               | 134174 (452.8) <sup>l</sup>                | <0.0005              | -30 36 49.5        | 3.92           | <0.0005              |
| Right hemisphere              | 134174 (452.8) <sup>l</sup>                | <0.0005              | 20 66 24           | 3.90           | <0.0005              |
| Left premotor cortex          | 134174 (452.8) <sup>l</sup>                | <0.0005              | -27 -7.5 46.5      | 3.79           | <0.0005              |
| Lateral temporal cortex       |                                            |                      |                    |                |                      |
| Left hemisphere               | 134174 (452.8) <sup>l</sup>                | <0.0005              | -49.5 -3 -13       | 2.96           | 0.003                |
| Right hemisphere              | 134174 (452.8) <sup>l</sup>                | <0.0005              | 55 -36 0           | 3.46           | 0.0006               |
| Hippocampal-complex           | 134174 (452.8) <sup>l</sup>                | <0.0005              | -21 -30 -17        | 3.97           | <0.0005              |
| Cerebellum                    |                                            |                      |                    |                |                      |
| Left hemisphere               | 134174 (452.8) <sup>l</sup>                | <0.0005              | -18 -54 -33        | 4.03           | <0.0005              |
| Right hemisphere              | 134174 (452.8) <sup>l</sup>                | <0.0005              | 18 -54 -32         | 4.07           | <0.0005              |
| Inferior parietal cortex      |                                            |                      |                    |                |                      |
| Right hemisphere              | 134174 (452.8) <sup>l</sup>                | <0.0005              | 61.5 -58 37        | 3.45           | 0.0007               |
| Left hemisphere               | 8126 (27.4)                                | <0.0005              | -53 -49 21         | 3.44           | 0.0007               |
| <b>White Matter</b>           |                                            |                      |                    |                |                      |
| Cerebellum                    |                                            |                      |                    |                |                      |
| Left hemisphere               | 80553 (271.9) <sup>m</sup>                 | <0.0005              | -50 -58 -53        | 5.15           | <0.0005              |
| Right hemisphere              | 80553 (271.9) <sup>m</sup>                 | <0.0005              | 39 -58 -36         | 3.06           | 0.0025               |
| Brainstem/Thalamus            | 80553 (271.9) <sup>m</sup>                 | <0.0005              | 2 -28 -48          | 4.13           | <0.0005              |
| Basal ganglia                 | 80553 (271.9) <sup>m</sup>                 | <0.0005              | 27 12 -9           | 3.34           | 0.001                |
| Sensorimotor region           |                                            |                      |                    |                |                      |
| Left hemisphere               | 80553 (271.9) <sup>m</sup>                 | <0.0005              | -20 -30 66         | 4.38           | <0.0005              |
| Right hemisphere              | 80553 (271.9) <sup>m</sup>                 | <0.0005              | 26 -28 60          | 4.27           | <0.0005              |
| Left premotor region          | 80553 (271.9) <sup>m</sup>                 | <0.0005              | -22 -1 39          | 3.49           | 0.0006               |
| Left inferior parietal region | 815 (2.7)                                  | 0.0195               | -8 -61 31          | 3.40           | 0.0008               |
| Right temporal region         | 967 (3.3)                                  | 0.0075               | 53 -43 -11         | 2.73           | 0.003                |

<sup>a</sup> Hit reaction time-standard error.

<sup>b</sup> The number of voxels each showing statistically significant association with lifelong residential surrounding greenness.

<sup>c</sup> Cluster size p-value which establishes the probability of the occurrence of a cluster of the specified voxel size or larger under the null hypothesis of a brain made of voxels with only spatially autocorrelated noise.

<sup>d</sup> x y z, coordinates of the voxel with maximum (peak) t-value inside the corresponding cluster provided in Montreal Neurological Institute (MNI) space.

<sup>e</sup> Maximum (peak) t-value within the cluster. The t-values are generated from the voxel-wise regression model.

<sup>f</sup> Peak p-value which establishes the probability of occurrence of the specified t-value or greater generated by the voxel-wise regression model. The p-value of each row corresponds to the maximum (peak) t-value of each cluster.

<sup>g</sup> Parts of a single cluster.

<sup>h</sup> Parts of a single cluster.

<sup>i</sup> Parts of a single cluster.

<sup>j</sup> Parts of a single cluster.

<sup>k</sup> Parts of a single cluster.

<sup>l</sup> Parts of a single cluster.

<sup>m</sup> Parts of a single cluster.
